# Supplementary material for: Higher Incidence of BK Virus Nephropathy in Pediatric Kidney Allograft Recipients with Alport Syndrome
Source: PubMed Central journal article supplement (PMC6517952; doi:10.3390/jcm8040491), 2019-04-11
Supplement: jcm-08-00491-s001.pdf [file jcm-08-00491-s001.pdf]

**Table 1.** Baseline characteristics of patients with and without BK viremia.

| Characteristic                      | BK Viremia (n = 30) | Non-BK Viremia (n = 138) | Total (n = 168) | p-Value |
|-------------------------------------|---------------------|--------------------------|-----------------|---------|
| Sex, M:F                            | 19:11               | 82:56                    | 101:67          | 0.692   |
| Recipient age at transplant, years  | 13.3 (2.0–19.9)     | 13.3 (1.5–19.9)          | 13.3 (1.5–19.9) | 0.720   |
| Primary kidney disease              |                     |                          |                 |         |
| Glomerulopathy                      | 19 (63.3)           | 71 (51.4)                | 90 (53.6)       | 0.111   |
| CAKUT                               | 8 (26.7)            | 28 (20.3)                | 36 (21.4)       |         |
| Others                              | 3 (10.0)            | 39 (28.3)                | 42 (25.0)       |         |
| Alport syndrome                     | 3 (10.0)            | 7 (5.1)                  | 10 (6.0)        | 0.387   |
| Donor type                          |                     |                          |                 |         |
| Deceased donor                      | 16 (53.3)           | 50 (36.2)                | 66 (39.3)       | 0.082   |
| Living donor                        | 14 (46.7)           | 88 (63.8)                | 102 (60.7)      |         |
| Recipient age at transplant, years  |                     |                          |                 |         |
| 0 to <7                             | 4 (13.3)            | 24 (16.9)                | 28 (16.7)       | 0.864   |
| 7 to <13                            | 10 (33.3)           | 48 (33.8)                | 54 (32.1)       |         |
| ≥13                                 | 16 (53.3)           | 70 (49.3)                | 86 (51.2)       |         |
| HLA mismatch                        |                     |                          |                 |         |
| 0–2                                 | 6 (20.0)            | 29 (21.0)                | 35 (20.8)       | 0.471   |
| 3–4                                 | 23 (76.7)           | 95 (68.8)                | 118 (70.2)      |         |
| 5–6                                 | 1 (3.3)             | 14 (10.1)                | 15 (8.9)        |         |
| Acute cellular rejection            | 20/30 (66.7)        | 79/127 (62.2)            | 99/157 (63.1)   | 0.649   |
| Immunosuppression                   |                     |                          |                 |         |
| MMF                                 | 30                  | 138                      | 168             | 1.000   |
| Tac                                 | 30                  | 137 (99.3)               | 167 (99.4)      | 1.000   |
| BSX                                 | 29 (96.7)           | 108 (78.3)               | 137 (81.5)      | 0.019   |
| ATG                                 | 2 (6.7)             | 7 (5.1)                  | 9 (5.4)         | 0.663   |
| Transplant year                     |                     |                          |                 |         |
| 2001–2008                           | 4 (13.3)            | 43 (31.2)                | 47 (28.0)       | 0.049   |
| 2009–2015                           | 26 (86.7)           | 95 (68.8)                | 121 (72.0)      |         |
| CMV infection                       | 14/27 (51.9)        | 49/109 (45.0)            | 63/136 (46.3)   | 0.520   |
| EBV infection                       | 11/24 (45.8)        | 60/112 (53.6)            | 71/136 (52.2)   | 0.491   |
| Pneumocystis jirovecii pneumonia    | 3 (10.0)            | 3 (2.2)                  | 6 (3.6)         | 0.071   |
| PTLD                                | 1 (3.3)             | 7 (5.1)                  | 8 (4.8)         | 1.000   |
| Comorbidity                         |                     |                          |                 |         |
| Hypertension                        | 5 (16.7)            | 24 (17.4)                | 29 (17.3)       | 1.000   |
| Cardiovascular disease <sup>1</sup> | 2 (6.7)             | 6 (4.3)                  | 8 (4.8)         | 0.634   |
| Diabetes mellitus                   | 1(3.3)              | 8 (5.8)                  | 9 (5.4)         | 1.000   |
| Dyslipidemia                        | 0                   | 10 (7.2)                 | 10 (6.0)        | 0.212   |
| Neurological disorder <sup>2</sup>  | 3 (10.0)            | 11 (8.0)                 | 14 (8.3)        | 0.718   |
| Liver disease <sup>3</sup>          | 3 (10.0)            | 5 (3.6)                  | 8 (4.8)         | 0.153   |
| Cancer except PTLD                  | 0                   | 1 (0.7)                  | 1 (0.6)         | 1.000   |
| Mortality                           | 1 (3.3)             | 1 (0.7)                  | 2 (1.2)         | 0.326   |

<sup>1</sup>Cardiomyopathy, myocarditis, congenital heart defect, and myocardial infarction. <sup>2</sup>Developmental delay, congenital malformations of the nervous system, and epilepsy. <sup>3</sup>Hepatitis, fatty liver, congenital hepatic fibrosis, and liver cirrhosis. Values are expressed as numbers (%) and median (range). Abbreviations: BKVN, BK virus nephropathy; CAKUT, congenital anomalies of the kidney and the urinary tract; MMF, mycophenolate mofetil; Tac, tacrolimus; ATG, anti-thymocyte globulin; BSX, basiliximab; CMV, cytomegalovirus; EBV, Epstein-Barr virus; PTLD, post-transplant lymphoproliferative disease

**Table S2.** Risk factors for BK viremia

| Factors                                | Univariate | Multivariate <sup>1</sup> |         |
|----------------------------------------|------------|---------------------------|---------|
|                                        | P-value    | HR (95% CI)               | P-value |
| Primary kidney disease, glomerulopathy | 0.192      | 1.702 (0.808–3.583)       | 0.162   |
| Donor type, deceased                   | 0.095      | 1.561 (0.741–3.288)       | 0.241   |
| Basiliximab                            | 0.015      | 8.069 (1.097–59.361)      | 0.040   |
| Transplant year, 2009–2015             | 0.029      | 2.149 (0.734–6.296)       | 0.163   |

<sup>1</sup>Factors with a value of P <0.25 in the univariate analysis were included in the multivariate analysis. Abbreviations: HR, hazard ratio; CI, confidence interval

**Table S3.** Comparison between the BKVN group and only-BK viremia groups

| Characteristic                     | BKVN (n = 6)    | Only-BK viremia (n = 24) | Total (n = 30)  | P-value |
|------------------------------------|-----------------|--------------------------|-----------------|---------|
| Sex, M:F                           | 3:3             | 16:8                     | 19:11           | 0.641   |
| Recipient age at transplant, years | 14.5 (7.7–18.9) | 12.7 (2.0–19.9)          | 13.3 (2.0–19.9) | 0.667   |
| Primary kidney disease             |                 |                          |                 |         |
| Glomerulopathy                     | 5               | 14 (58.3)                | 19 (63.3)       | 0.275   |
| CAKUT                              | 0               | 8 (33.3)                 | 8 (26.7)        |         |
| Others                             | 1               | 2 (8.3)                  | 3 (10.0)        |         |
| Alport syndrome                    | 3 (50)          | 0                        | 3 (10.0)        | 0.005   |
| Donor type                         |                 |                          |                 |         |
| Deceased donor                     | 3 (50)          | 13 (54.2)                | 16 (53.3)       | 1.000   |
| Living donor                       | 3 (50)          | 11 (45.8)                | 14 (46.7)       |         |
| Recipient age at transplant, years |                 |                          |                 |         |
| 0 to <7                            | 0               | 4 (16.7)                 | 4 (13.3)        | 0.830   |
| 7 to <13                           | 2 (33.3)        | 8 (33.3)                 | 10 (33.3)       |         |
| ≥13                                | 4 (66.7)        | 12 (50)                  | 16 (53.3)       |         |
| HLA mismatch                       |                 |                          |                 |         |
| 0–2                                | 0               | 6 (25.0)                 | 6 (20.0)        | 0.436   |
| 3–4                                | 6               | 17 (70.8)                | 23 (76.7)       |         |
| 5–6                                | 0               | 1 (4.2)                  | 1 (3.3)         |         |
| Acute cellular rejection           | 4/6 (66.7)      | 16/24 (66.7)             | 20/30 (66.7)    | 1.000   |
| Immunosuppression                  |                 |                          |                 |         |
| MMF                                | 6               | 24                       | 30              | 1.000   |
| Tac                                | 6               | 24                       | 30              | 1.000   |
| BSX                                | 6               | 23 (95.8)                | 29 (96.7)       | 1.000   |
| ATG                                | 0               | 2 (8.3)                  | 2 (6.7)         | 1.000   |
| Transplant year                    |                 |                          |                 |         |
| 2001–2008                          | 0               | 5 (20.8)                 | 5 (16.7)        | 0.557   |
| 2009–2015                          | 6               | 19 (79.2)                | 25 (83.3)       |         |
| CMV infection                      | 3/5 (60.0)      | 11/22 (50)               | 14/27 (51.9)    | 1.000   |

|                                          |                                |                     |                         |        |
|------------------------------------------|--------------------------------|---------------------|-------------------------|--------|
| EBV infection                            | 1/4 (25.0)                     | 10/20 (50)          | 11/24 (45.8)            | 0.596  |
| Pneumocystis jirovecii pneumonia         | 0                              | 3 (12.5)            | 3 (10.0)                | 1.000  |
| PTLD                                     | 0                              | 1 (4.2)             | 1 (3.3)                 | 1.000  |
| Comorbidity                              |                                |                     |                         |        |
| Hypertension                             | 2 (33.3)                       | 3 (12.5)            | 5 (16.7)                | 0.254  |
| Cardiovascular disease <sup>1</sup>      | 0                              | 2 (8.3)             | 2 (6.7)                 | 1.000  |
| Diabetes mellitus                        | 0                              | 1 (4.2)             | 1 (3.3)                 | 1.000  |
| Dyslipidemia                             | 0                              | 0                   | 0                       | 1.000  |
| Neurological disorder <sup>2</sup>       | 0                              | 3 (12.5)            | 3 (10.0)                | 1.000  |
| Liver disease <sup>3</sup>               | 1 (16.7)                       | 2 (8.3)             | 3 (10.0)                | 0.501  |
| Cancer except PTLD                       | 0                              | 0                   | 0                       | 1.000  |
| Mortality                                | 0                              | 1 (4.2)             | 1 (3.3)                 | 1.000  |
| Initial BKV level, copies/mL             | 46,508<br>(16,924–289,699)     | 437<br>(119–6,794)  | 699<br>(119–289,699)    | <0.001 |
| Peak BKV level, copies/mL                | 306,277<br>(41,914–10,165,825) | 561<br>(123–42,288) | 905<br>(123–10,165,825) | <0.001 |
| Tac dose at BK viremia, mg/kg/day        | 0.135 (0.053–0.330)            | 0.128 (0–0.369)     | 0.127 (0–0.369)         | 0.432  |
| Laboratory findings at BK viremia        |                                |                     |                         |        |
| Tac level, ng/mL                         | 6.0 (3.3–7.4)                  | 7.1 (2.6–14.2)      | 6.3 (2.6–14.2)          | 0.230  |
| Estimated GFR, mL/min/1.73m <sup>2</sup> | 43.2 (37.6–60.1)               | 67.5 (31.1–103.3)   | 63.4 (31.1–103.3)       | 0.065  |
| Hematuria                                | 1 (16.7)                       | 5 (20.8)            | 6 (20.0)                | 1.000  |
| Proteinuria                              | 0                              | 3 (12.5)            | 3 (10.0)                | 1.000  |

<sup>1</sup>Cardiomyopathy, myocarditis, congenital heart defect, and myocardial infarction. <sup>2</sup>Developmental delay, congenital malformations of the nervous system, and epilepsy. <sup>3</sup>Hepatitis, fatty liver, congenital hepatic fibrosis, and liver cirrhosis. Values are expressed as numbers (%) and median (range). Abbreviations: BKVN, BK virus nephropathy; CAKUT, congenital anomalies of the kidney and the urinary tract; MMF, mycophenolate mofetil; Tac, tacrolimus; ATG, anti-thymocyte globulin; CMV, cytomegalovirus; EBV, Epstein-Barr virus; BKV, BK virus; PTLD, post-transplant lymphoproliferative disease GFR, glomerular filtration rate
